# Supplementary material for: Aqueous synthesis of silver nanoparticles stabilized by cationic cellulose and their catalytic and antibacterial activities
Source: Royal Society of Chemistry journal article supplement (doi:10.1039/c3ra42242a), 2013-01-01
Supplement: c3ra42242a.pdf [file c3ra42242a.pdf]

## Electronic supplementary information

### **Aqueous Synthesis of Silver Nanoparticles Immobilized on Cationic Cellulose Matrix and Their Catalytic and Antibacterial Activities**

Jun You<sup>a</sup>, Mengxiong Xiang<sup>b</sup>, Haoze Hu<sup>a</sup>, Jun Cai<sup>b</sup>, Jinping Zhou<sup>\*a</sup>, Yaping Zhang<sup>c</sup>

*<sup>a</sup>Department of Chemistry, Wuhan University, Wuhan 430072, China*

*<sup>b</sup>Hubei Provincial Cooperative Innovation Center of Industrial Fermentation and Key Laboratory of Fermentation Engineering (Ministry of Education), Hubei University of Technology, Wuhan 430068, China*

*<sup>c</sup>State Key Laboratory Cultivation Base for Nonmetal Composites and Functional Materials, Southwest University of Science and Technology, Mianyang, 621010, China*

---

\* Corresponding author, Tel: +86-27-87219274, Fax: +86-27-68754067

E-mail: [zhoujp325@whu.edu.cn](mailto:zhoujp325@whu.edu.cn) (J. Zhou)

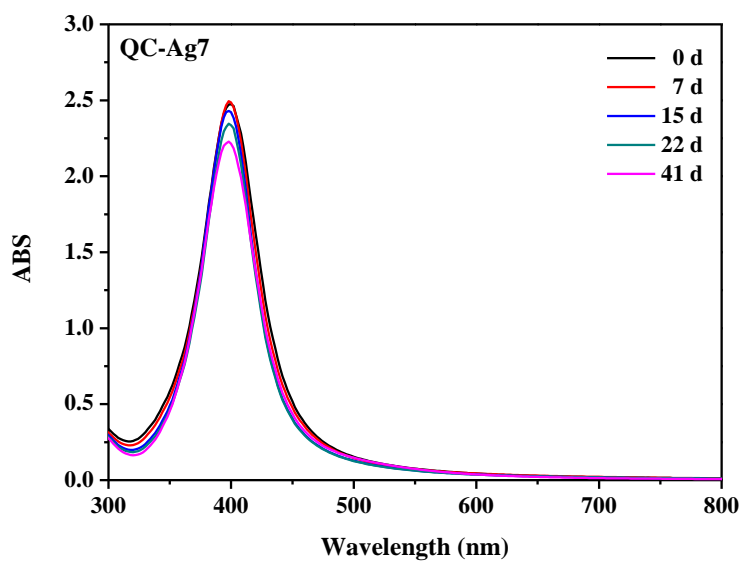

**Fig. S1** Time dependence of the UV-Vis absorption spectra of the QC-Ag7 aqueous solutions.

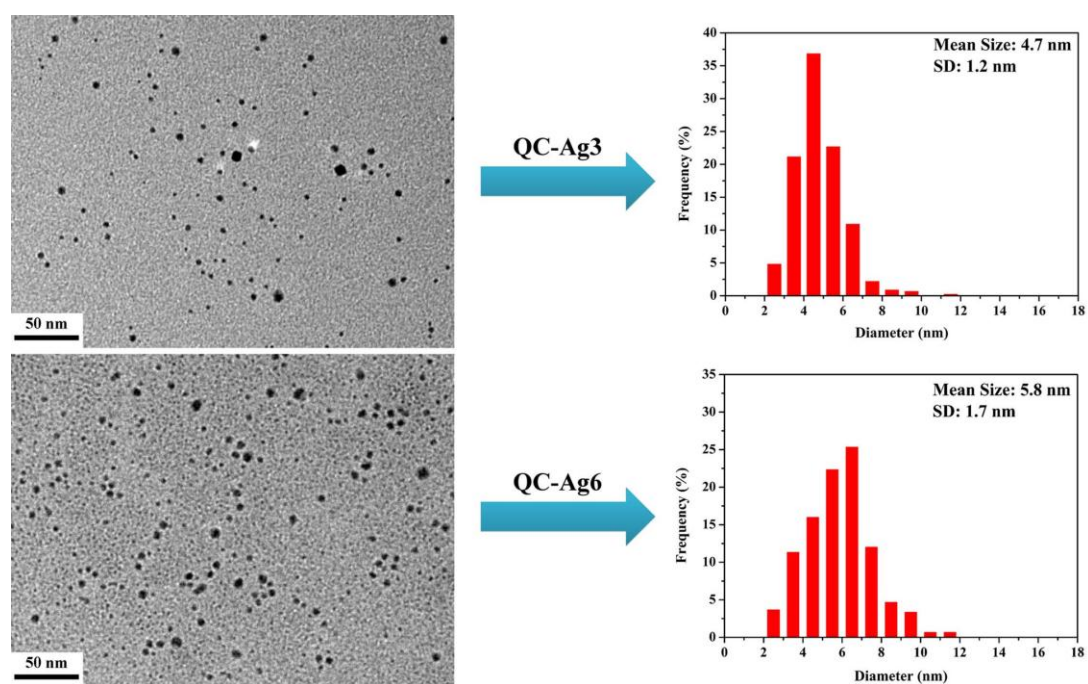

**Fig. S2** TEM images (left, the scale bar is 100 nm) and size distribution histograms (right) of the redispersed QC-Ag NPs in distilled water.

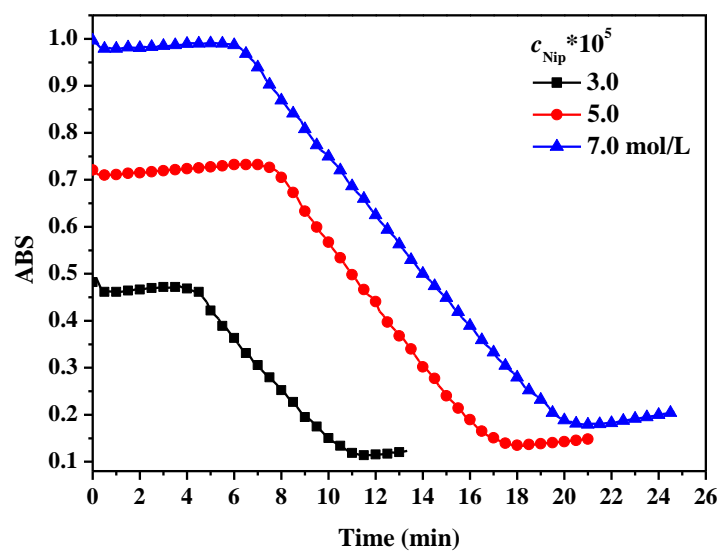

**Fig. S3** Time dependence of the absorption of Nip at 400 nm at various initial Nip concentrations in the presence of QC-Ag7 NPs. ( $c_{\text{Ag NPs}} = 3.7 \times 10^{-6}$  mol/L,  $c_{\text{NaBH}_4} = 8 \times 10^{-3}$  mol/L)
